# Supplementary material for: Overexpression of wildtype EGFR is tumorigenic and denotes a therapeutic target in non-small cell lung cancer
Source: PubMed Central journal article supplement (PMC4826177; doi:10.18632/oncotarget.6461), 2015-12-04
Supplement: oncotarget-07-3884-s001.pdf [file oncotarget-07-3884-s001.pdf]

# Overexpression of wildtype EGFR is tumorigenic and denotes a therapeutic target in non-small cell lung cancer

## Supplementary Material

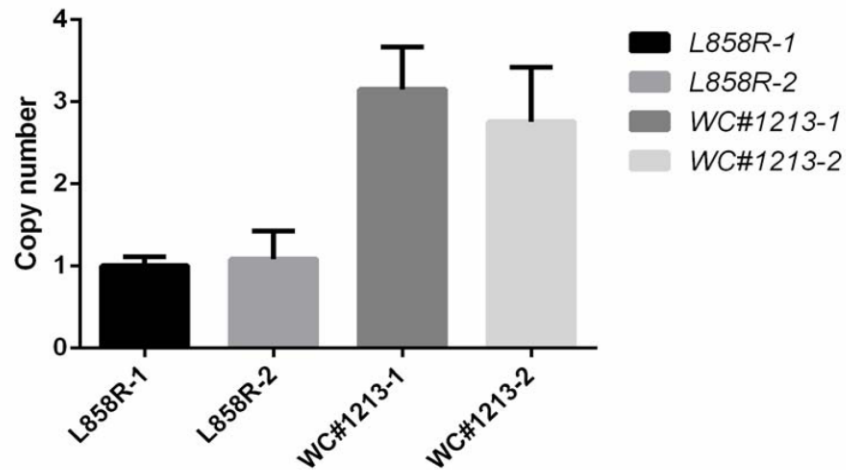

### Supplementary figure 1

#### Founder line WC1213 harbors 3 copies of TetOnwtEGFR transgene

Tail DNA was isolated from our earlier established transgenic EGFR L858R mice (singlecopy) and WC1213 transgenic mice. Realtime PCR was carried out with primers indicated below. 2 mice each was used. Result indicated that WC1213 founder line harbored 3 copies of transgene.

ATCCAGTGTGCCACTACATTG EGFRF TACTTCCAGACCAGGGTGTGTGTTGT ActinF acagcttctctttgatgtcagc ActinR  
tgtgatggactccggagacgg

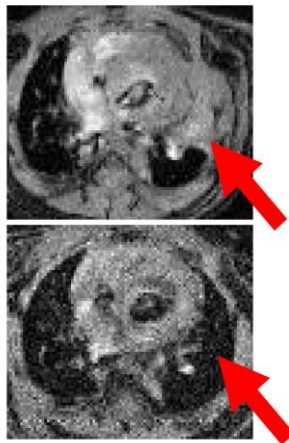

### **Supplementary figure 2**

#### **wtEGFR driven lung cancers depend on continuous expression of EGFR transgene for maintenance**

CC10rtTA/Tet-OnEGFR bitransgenic mice were fed with doxycycline diet for around 8 months and then subjected to doxycycline withdrawal for 2 weeks. MRI images recorded before (upper panel) and after (lower panel) doxycycline withdrawal showed complete tumor regression. Tumor region highlighted with red arrow head.

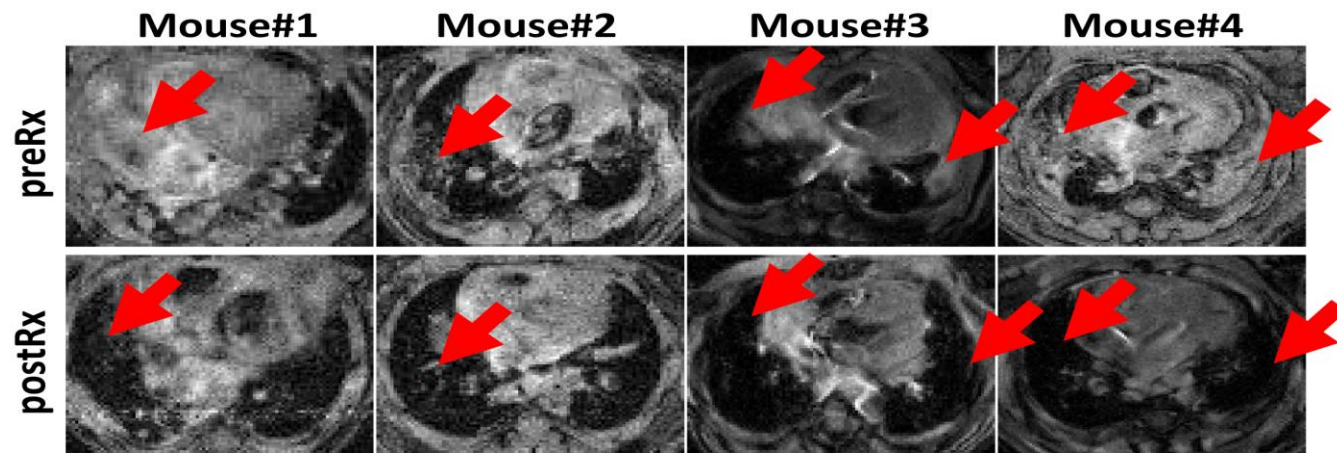

### Supplementary figure 3

**Wt EGFR driven lung cancers are sensitive to erlotinib treatment** CC10rtTA/TetO wt EGFR bitransgenic mice were fed with doxycycline diet for around 8 months and then treated with erlotinib for 2 weeks. MRI images recorded before (upper panel) and after (lower panel) erlotinib treatment showed dramatic tumor regression. Tumor region highlighted with red arrow head. Result revealed tumor regression in all 4 mice

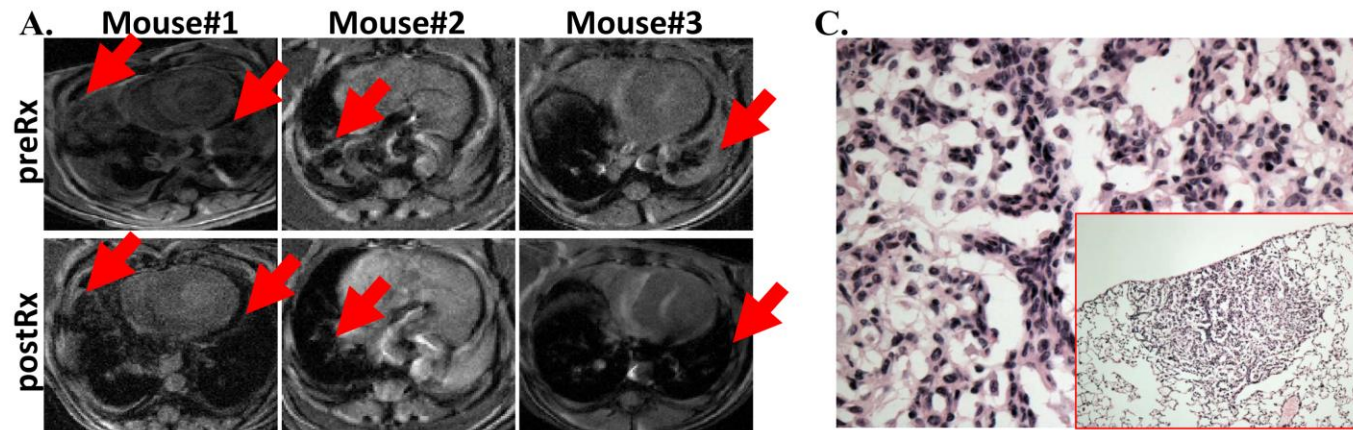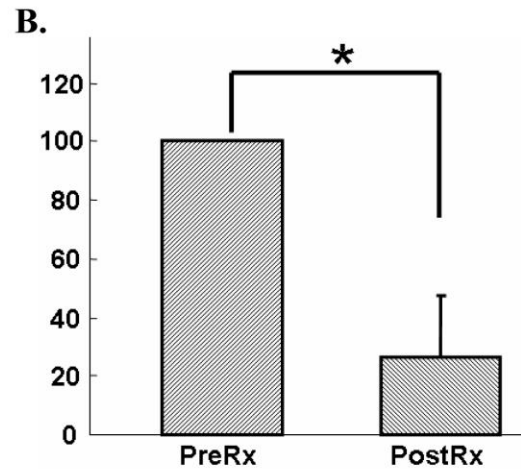

#### Supplementary figure 4

##### Wt EGFR driven lung cancers are sensitive to cetuximab treatment

Three CC10rtTA/TetO wt EGFR bitransgenic mice were fed with doxycycline diet for around 8 months and then treated with cetuximab for 2 weeks. **A.** MRI images recorded before (upper panel) and after (lower panel) cetuximab treatment showed dramatic tumor regression. Tumor region highlighted with red arrow head. **B.** Quantification of tumor regression.

**C.** H&E analysis of the lung pathology revealed almost more histology with occasional areas of fibrosis indicating remodeling of original tumor area.

**Supplementary table 1: OncoCarta™ Panel v1.0—mutations list****(total 19 oncogenes and 238 sites)**

| <b>oncogene (mutational sites)</b> | <b>Chromosomal locus</b> | <b>Mutational detail</b>                                                                                                                                                   |  |
|------------------------------------|--------------------------|----------------------------------------------------------------------------------------------------------------------------------------------------------------------------|--|
| ABL1(14)                           | 9q34.1                   | G250E, Q252H, Y253H, Y253F, E255K, E255V, D276G, F311L, T315I, F317L, M351T, E355G, F359V, H396R                                                                           |  |
| AKT1(7)                            | 14q32.32                 | V461L, P388T, L357P, E319G, V167A, Q43X, E17K                                                                                                                              |  |
| AKT2(2)                            | 9q13.1-q13.2             | S302G, R371H                                                                                                                                                               |  |
| BRAF(24)                           | 7q34                     | G464R, G464V/E, G466R, F468C, G469S, G469E, G469A, G469V, G469R, G469R, D594V/G, F595L, G596R, L597S, L597R, L597Q, L597V, T599I, V600E, V600K, V600R, V600L, K601N, K601E |  |
| CDK(2)                             | 12q14                    | R24C, R24H                                                                                                                                                                 |  |

|          |              |                                                                                                                                                                                                                                                                                                                                                                                                                                                                                                                                                                 |
|----------|--------------|-----------------------------------------------------------------------------------------------------------------------------------------------------------------------------------------------------------------------------------------------------------------------------------------------------------------------------------------------------------------------------------------------------------------------------------------------------------------------------------------------------------------------------------------------------------------|
| EGFR(43) | 7p21         | R108K, T263P, A289V, G598V, E709K/H, E709A/G/V, G719S/C, G719A, M766_A767insAI, S768I, V769_D770insASV, V769_D770insCV, D770_N771>AGG/N771>GF/N771T, D770_N771insG, V769_D770insASV, D770_N771insGF/D770_N771insGL, D770fs*61/D770_N771insAPW, P772_H773insV, H773N, H773_V774insNPH/PH/H, V774_C775insHV, T790M, L858R, L861Q, E746_A750del, E746_T751del, E746_T751>A/V/S, E746_S752>V/A/D/I, L747_E749del, L747S, L747_A750del, L747_A750>P, L747_T751del, L747_T751>P, L747_S752del, L747_P753>S/Q, A750P, T751A, T751P, T751I, S752F, S752_I759del, P753Q, |
| ERBB2(7) | 17q21.1      | L755P, G776S/LC, G776VC/VC,A775_G776insYVMA, P780_Y781insGSP,P780_Y781insGSP, S779_P780insVGS                                                                                                                                                                                                                                                                                                                                                                                                                                                                   |
| FGFR1(2) | 8p11.2-p11.1 | S125L, P252T                                                                                                                                                                                                                                                                                                                                                                                                                                                                                                                                                    |
| FGFR3(5) | 4p16.3       | G370C, Y373C, A391E, K650Q/E, K650T/M                                                                                                                                                                                                                                                                                                                                                                                                                                                                                                                           |
| FLT3(3)  | 13q12        | I836del, D835H/Y                                                                                                                                                                                                                                                                                                                                                                                                                                                                                                                                                |
| HRAS(6)  | 11p15.5      | G12V/D, G13C/R/S, Q61H/H, Q61L/R/P, Q61K                                                                                                                                                                                                                                                                                                                                                                                                                                                                                                                        |
| JAK(1)   | 9p24         | V617F                                                                                                                                                                                                                                                                                                                                                                                                                                                                                                                                                           |
| KIT(27)  | 4q11-q12     | D52N, Y503_F504insAY, W557R/R/G, V559D/A/G,V559I, V560D/G, K550_K558del, K558_V560del,K558_E562del, V559del, V559_V560del, V560del,Y570_L576del, E561K, L576P, P585P, D579del,K642E, D816V, D816H/Y, V825A, E839K, M552L,Y568D, F584S, P551_V555del, Y553_Q556del                                                                                                                                                                                                                                                                                               |

|            |         |                                                                                                      |  |
|------------|---------|------------------------------------------------------------------------------------------------------|--|
| KRAS(12)   | 12p12.1 | G12C, G12R, G12S, G12V, G12D, G12A, G12F,G13V/D, A59T, Q61E/K, Q61L/R/P, Q61H/H                      |  |
| MET(5)     | 7q31    | R970C, T992I, Y1230C, Y1235D, M1250T                                                                 |  |
| NRAS(8)    | 1p13.2  | G12V/A/D, G12C/R/S, G13V/A/D, G13C/R/S, A18T,Q61L/R/P, Q61H, Q61E/K                                  |  |
| PDGFRA(11) | 7p22    | V561D, T674I, F808L, D846Y, N870S, D1071N,D842_H845del, I843_D846del, S566_E571>K,I843_S847>T, D842V |  |
| PIK3CA(13) | 3q26.3  | R88Q, N345K, C420R, P539R, E542K, E545K,Q546K, H701P, H1047R/L, H1047Y, R38H, C901F,M1043I           |  |
| RET(6)     | 10q11.2 | C634R, C634W, C634Y, E632_L633del, M918T,A664D                                                       |  |

**Supplementary Table 4 Clinicopathological characteristics of 61 NSCLC patients with wild-type EGFR**

---

**Age at diagnosis, y**

|           |           |
|-----------|-----------|
| mean (SD) | 55.8±9.5  |
| median    | 55.0      |
| range     | 36.0-77.0 |

**Sex, No. (%)**

|       |           |
|-------|-----------|
| women | 18 (29.5) |
| men   | 43 (70.5) |

**Pathology, No. (%)**

|         |           |
|---------|-----------|
| ADC     | 48 (78.7) |
| non-ADC | 13 (21.3) |

**Stage, No. (%)**

|      |           |
|------|-----------|
| IIIB | 1 (1.6)   |
| IV   | 60 (98.4) |

**Gefitinib, No. (%)**

|           |           |
|-----------|-----------|
| 1st line  | 19 (31.1) |
| ≥2nd line | 42 (68.9) |

**EGFR h-score, No. (%)**

|               |           |
|---------------|-----------|
| EGFR positive | 31 (50.8) |
|---------------|-----------|

---



---

|                                           |           |
|-------------------------------------------|-----------|
| EGFR negative                             | 30 (49.2) |
| <b>Gefitinib's best response, No. (%)</b> |           |
| PR                                        | 6(9.8%)   |
| SD                                        | 32(52.5%) |
| PD                                        | 23(37.7%) |

---

Abbreviations: PD-L1, programmed cell death-ligand 1; ADC, adenocarcinoma; non-ADC, non-adenocarcinoma; EGFR, epidermal growth factor receptor; EGFR-TKI, EGFR-tyrosine kinase inhibitor.

**Supplementary Table 5 Multivariate analyses of PFS and OS**

| Parameter        | PFS                   |           |                   |         | OS                    |           |             |         |
|------------------|-----------------------|-----------|-------------------|---------|-----------------------|-----------|-------------|---------|
|                  | Multivariate analysis |           |                   |         | Multivariate analysis |           |             |         |
|                  | N                     | HR        | 95%CI             | P-value | N                     | HR        | 95%CI       | P-value |
| <b>Age</b>       |                       |           |                   |         |                       |           |             |         |
| ≤50y             | 1 17                  |           |                   |         | 1 17                  |           |             |         |
| >50y             | 44                    | 1.00<br>0 | 0.439-2.280       | 1.000   | 44                    | 2.25<br>0 | 0.553-9.153 | 0.257   |
| <b>Sex</b>       |                       |           |                   |         |                       |           |             |         |
| female           | 1 18                  |           |                   |         | 1 18                  |           |             |         |
| male             | 43                    | 1.00<br>0 | 0.489-2.045       | 1.000   | 43                    | 1.18<br>5 | 0.395-3.555 | 0.762   |
| <b>Pathology</b> |                       |           |                   |         |                       |           |             |         |
| ADC              | 1 48                  |           |                   |         | 1 48                  |           |             |         |
| non-ADC          | 13                    | 1.00<br>0 | 0.366-2.734       | 1.000   | 13                    | 1.31<br>6 | 0.306-5.567 | 0.712   |
| <b>Stage</b>     |                       |           |                   |         |                       |           |             |         |
| IIIB             | 1 1                   |           |                   |         | 1 1                   |           |             |         |
| IV               | 60                    | 1.00<br>0 | 0.000-<br>5118736 | 0.750   | 60                    | 0.15<br>9 | 0.016-1.563 | 0.115   |

| <b>Gefitinib</b>    |    |           |             |       |    |           |             |       |
|---------------------|----|-----------|-------------|-------|----|-----------|-------------|-------|
| 1st line            | 1  | 19        |             |       | 1  | 19        |             |       |
| ≥2nd line           | 42 | 1.00<br>0 | 0.509-1.963 | 1.000 | 42 | 0.96<br>3 | 0.358-2.589 | 0.941 |
| <b>EGFR h-score</b> |    |           |             |       |    |           |             |       |
| negative            | 1  | 30        |             |       | 1  | 30        |             |       |
| positive            | 31 | 1.00<br>0 | 0.513-1.950 | 1.000 | 31 | 0.60<br>6 | 0.220-1.669 | 0.332 |

Abbreviations: OS, overall survival; PFS, progression-free survival; HR, hazard ratio; 95%CI, 95% confidence intervals;

ADC, adenocarcinoma; non-ADC, non-adenocarcinoma; EGFR, epidermal growth factor receptor; EGFR-TKI, EGFR-

tyrosine kinase inhibitor.

Supplementary Table 6 duration of response types among patients

| Response type | N  | PFS (months, mean $\pm$ SD) |
|---------------|----|-----------------------------|
| PR            | 6  | 12.77 $\pm$ 10.72           |
| SD            | 32 | 7.43 $\pm$ 8.80             |
| PD            | 23 | 1.32 $\pm$ 1.23             |
